# Supplementary material
Source: HighWire-hosted journal article supplement (https://jnm.snmjournals.org/highwire/filestream/94944/field_highwire_adjunct_files/0/173492_Supplemental_Data.pdf)

Supplemental Figure 1: Example of a 58-year old patient with biochemical recurrence after radical prostatectomy (Gleason Score 7; PSA level at PET examination 0.45 ng/ml) and a putative false positive LN by  $^{68}\text{Ga}$ -PSMA HBED-CC PET imaging: an unsuspecting, 3 mm LN is visible in the left obturator fossa on CT imaging (A, red arrow) that shows intense, focal and thus suspicious tracer uptake on  $^{68}\text{Ga}$ -PSMA HBED-CC PET (B) and PET/CT fusion imaging (C). Salvage lymphadenectomy with histological evaluation revealed no LNM. However, follow-up  $^{68}\text{Ga}$ -PSMA HBED-CC PET/MR 6 months after operation later revealed an increasing focal uptake of  $^{68}\text{Ga}$ -PSMA HBED-CC raising the question that the LN might have been missed during surgery (D).

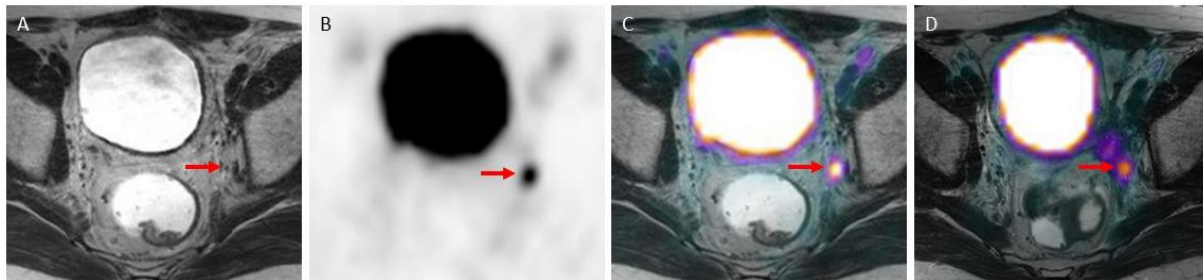

Supplement: 173492_Supplemental_Data.pdf [file 173492_Supplemental_Data.pdf]
